# Supplementary material for: Development of automated paper-based devices for sequential multistep sandwich enzyme-linked immunosorbent assays using inkjet printing
Source: Royal Society of Chemistry journal article supplement (doi:10.1039/c2lc40690j), 2012-10-24
Supplement: c2lc40690j.pdf [file c2lc40690j.pdf]

1 **Supplementary information**

2

3 **Section A**

4 **The automated paper-based device made using patterns 1 and 2 for sandwich**

5 **ELISA**

6 Figure 1: Schematic illustration of the automated paper-based device with 2 different designs for  
7 the sandwich ELISA. Pattern 1 was our first concept for controlling the reagent flow time on 1  
8 piece of the device. Pattern 2 was created to improve the sensitivity of the device over pattern 1.  
9 The automated paper-based device consisted of 3 parts. The first was an input “leg” at which the  
10 solution was applied to the device. The second was the reaction area; this was where the delaying  
11 channel patterns were created and where all the substances were located. The substrate and  
12 enzyme-linked detection Abs (enzyme-Ab2) were prepared in separate channels to prevent them  
13 from mixing together, which was accomplished by beginning the detection reaction after the Ab-  
14 Ag complex had been washed to remove the nonspecific bound Ag and free enzyme-Ab2  
15 (background). The third was the absorbent area created above the end of the channel (square area  
16 part in dotted line) to improve the wicking properties of the device. Four substances were applied  
17 on the device at different locations as follows: 1) the immobilized Ab that binds to free (Ag-  
18 unbound) enzyme-Ab2; 2) the immobilized Abs (Ab1) specific to the target Ag; 3) enzyme-Ab2;  
19 and 4) substrate.

20

21

22 **Section B**

23

24 **The sandwich ELISA procedure on our novel automated paper-based device**

25 A

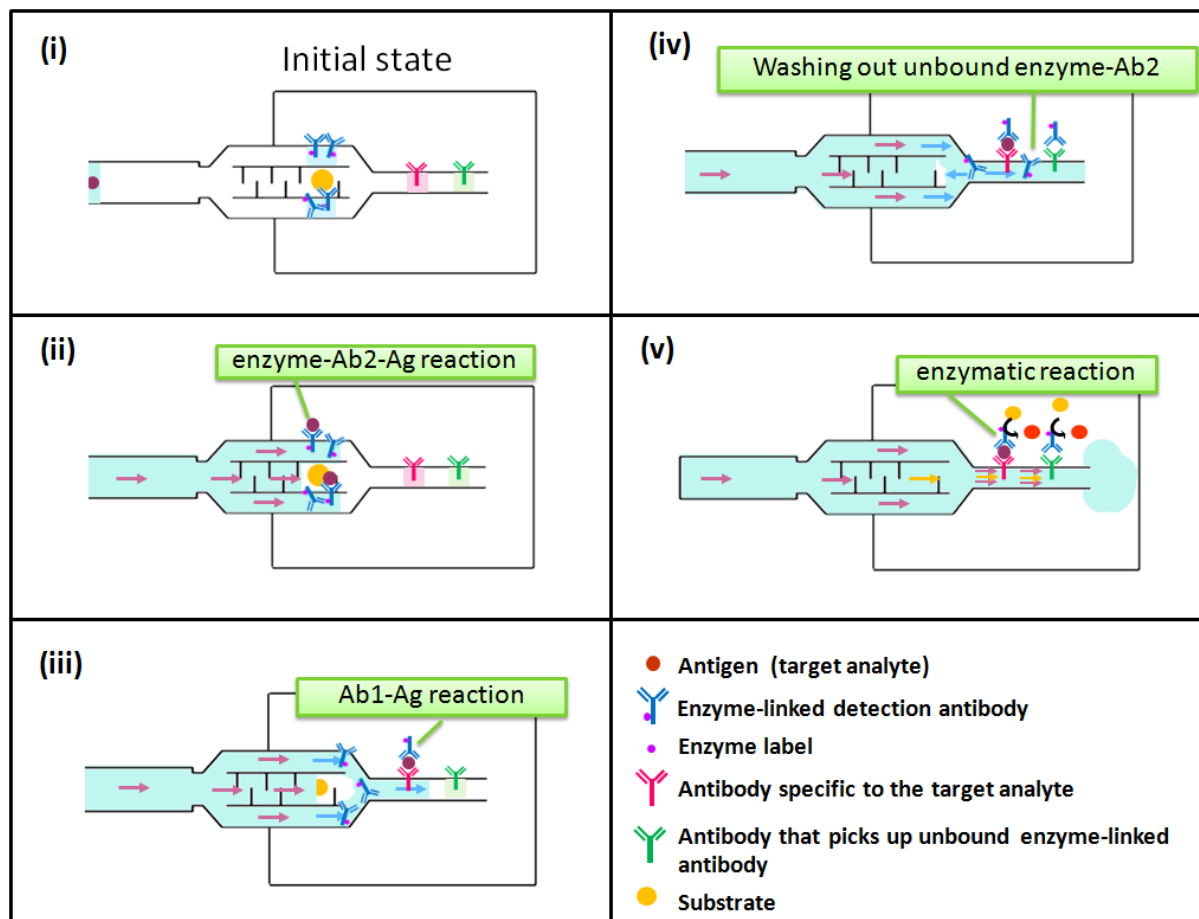

26

27

28

29

30

31

32

33

34

35 B

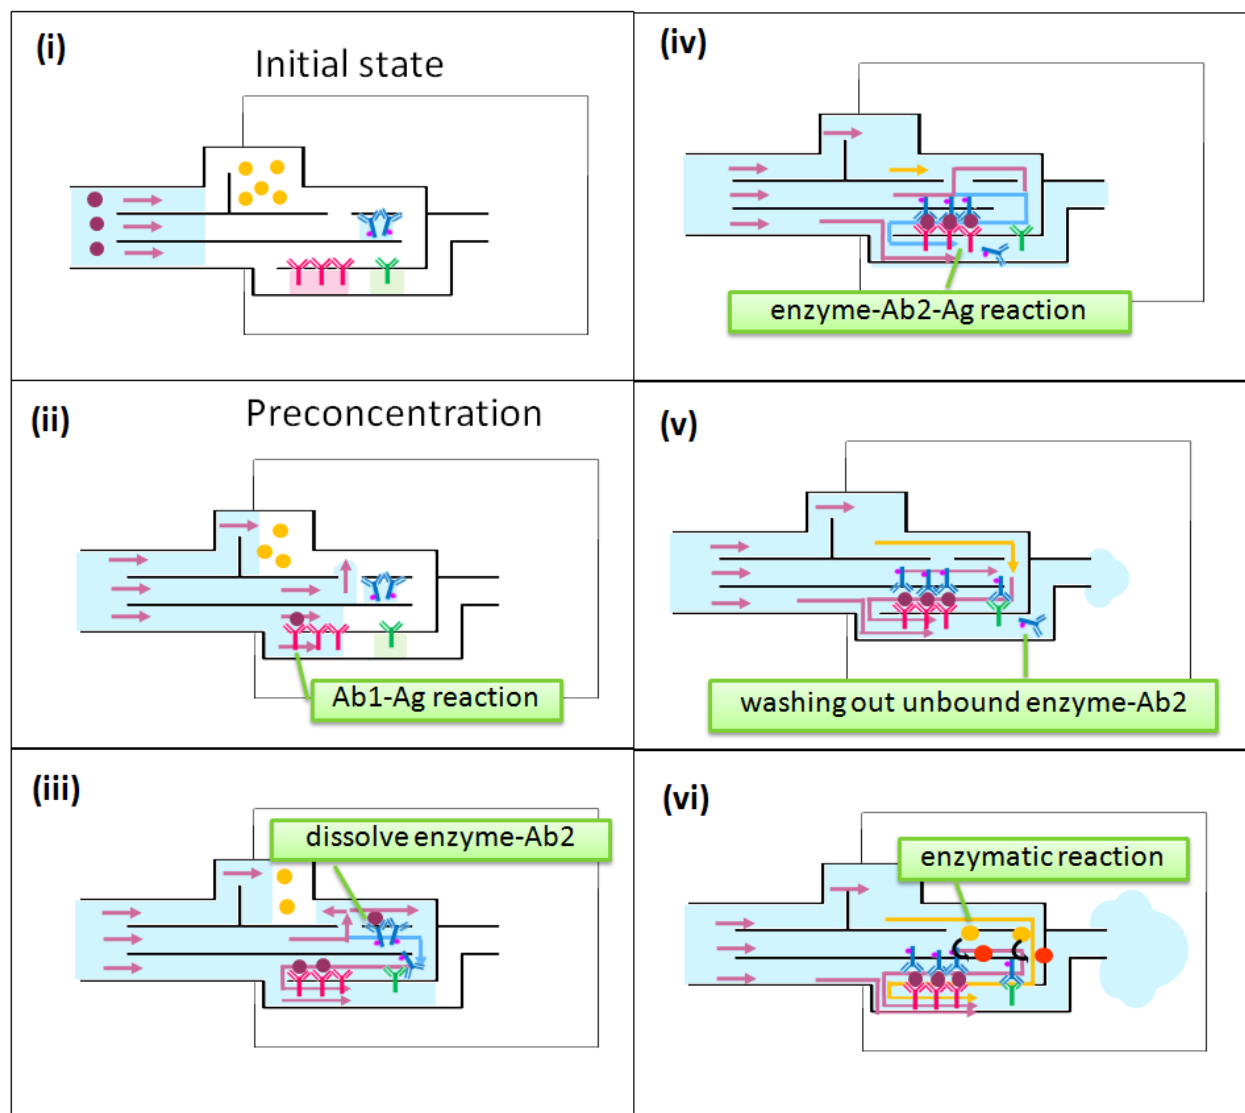

36

37 **Figure S1:** Schematic representation (based on the flow of real fluid in the pattern) of the  
38 procedure for the sandwich ELISA in planar views of the automated paper-based device for  
39 pattern 1 (A) and pattern 2 (B). The purple arrow represents the sample flow direction; the blue  
40 arrow represents the flow direction of the sample containing enzyme-linked detection antibody;  
41 and the yellow arrow represents the flow direction of the sample containing substrate.

42

43           The sandwich ELISA procedure is schematically shown in Fig. S2 and is briefly  
44 summarized as follows. First, for the automated paper-based device with pattern 1 (A), after the  
45 sample solution was applied to the device, (i) the sandwich ELISA automatically ran through the  
46 sequential reaction; (ii) the analyte solution migrated to the prespotted region of enzyme-Ab2 in  
47 the nondelaying channel, and the appropriate Ag(s) bound to the solubilized enzyme-Ab2 to  
48 form enzyme-Ab2-Ag complexes; (iii) the complexes were captured further along with  
49 immobilized Ab1 at the test zone; (iv) the free enzyme-Ab2 (not Ag-bound) was captured by the  
50 immobilized Ab at the control zone and washed away by sample solution; however, since some  
51 of the enzyme-Ab2-containing fluid may migrate to the delaying channel, contacting substrate  
52 containing sample fluid, color may be generated upstream of the test zone; and (v) the slower  
53 substrates migrating through the delaying channel were gradually dissolved and pass through the  
54 test zone and the control zone, allowing the enzyme reaction to occur and the color to develop  
55 (change) at the test and control zones.

56           Second, for the automated paper-based device with pattern 2 (B), after the sample  
57 solution was applied on the device, (i) the solution migrated along the device, entering all  
58 channels. The assays were run sequentially as follows: (ii) the analyte solution migrated upward  
59 to the testing channel where the Ag was captured with the pre-immobilized specific Ab1 at the  
60 test zone to form Ab1-Ag complexes (the Ag was preconcentrated in this step at the test zone);  
61 (iii) the analyte solution migrated to the prespot region with an excess of the enzyme-Ab2. The  
62 solubilized enzyme-Ab2 was rehydrated. The unbound enzyme-Ab2 and enzyme-Ab2 bound  
63 with Ag(s) then migrated upward to the test zone, and the affected analyte solution (in channel 1  
64 above the gap) migrated back to the testing channel, increasing the amount of antigen captured at  
65 the test zone. Additionally, the sample fluid that had passed through the gap between channels 2

66 and 3 reached the enzyme-Ab2-containing fluid, first at the top of channel 2, followed by the  
67 substrate; this minimized the background from the enzyme-Ab2 that interacted with the substrate  
68 before the test zone. (iv) Unbound enzyme-Ab2 captured Ab1-Ag at the test zone. (v) Excess  
69 unbound enzyme-Ab2 was then captured by immobilized Ab at the control zone. Free enzyme-  
70 Ab2 and low avidity Ags nonspecifically bound to the enzyme-Ab2 were removed and washed  
71 away from the test zone. (v) Finally, migrating substrate passed through the test zone and control  
72 zone, allowing the enzyme reaction to occur and the color to develop (change) at the test and  
73 control zones.

74

## 75 **Section C**

### 76 **Effects of printing parameters**

77 Figure 2S shows an image of the printed lines on the NC membrane obtained  
78 by applying different printing parameters. The inkjet printing parameters and the gap  
79 between the inkjet tip and surface of the NC membrane affected the width of the  
80 printed line pattern. These parameters included the following: 1) voltage supply, which  
81 must be 1000 V; 2) bias frequency [Fig. 2S (I)], where the printed line width decreased  
82 with increasing bias value; 3) frequency [Fig. 2S (II)], which behaved similarly to the  
83 bias frequency, where the printed line width decreased with increasing frequency  
84 value; and 4) the gap between the inkjet tip and surface of the NC membrane [Fig. 2S  
85 (III)], where the barrier width tended to decrease as the gap between the inkjet tip and  
86 surface of the NC membrane increased. To obtain a thin barrier width with no leakage,  
87 the parameters were adjusted as follows: voltage supply = 1000 V, bias = 200 V,  
88 frequency = 300 Hz, and gap between the inkjet tip and surface paper = 250  $\mu\text{m}$ .

89

90

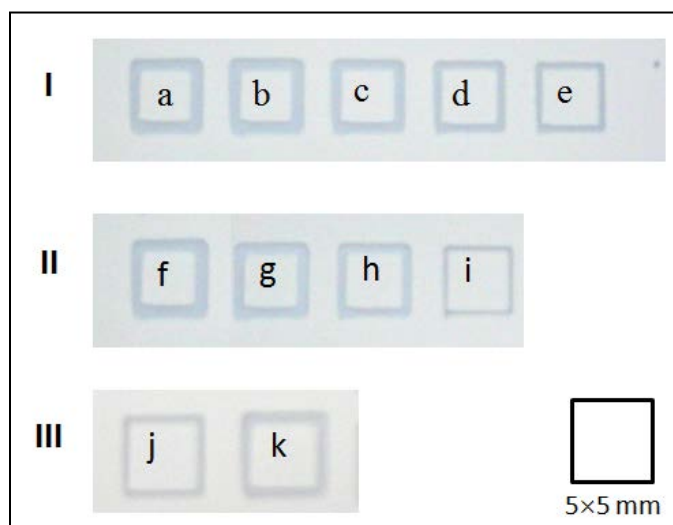

91

92

93 **Figure S2:** Image of the printed line on the NC membrane. (I) Fixed frequency of 0 V, fixed  
94 distance between the nozzle and paper of 250  $\mu\text{m}$ , and varying bias frequencies: a, 0; b, 50; c,  
95 100; d, 500; and e, 1000 Hz. (II) Fixed bias voltage of 0 V, fixed distance between nozzle and  
96 paper of 250  $\mu\text{m}$ , and varying frequencies: f, 0; g, 50; h, 100; and i; 500 Hz. (III) Fixed  
97 frequency of 300 V and fixed bias of 200 V, with varying distances between the nozzle and  
98 surface of the NC membrane: j, 250; and k, 500  $\mu\text{m}$ .

99

100

101

102

103

104

105

## 106 Section D

### 107 Analytical Application

108

109 Results of the determination of hCG spiked in urine samples are shown in Fig. S3.

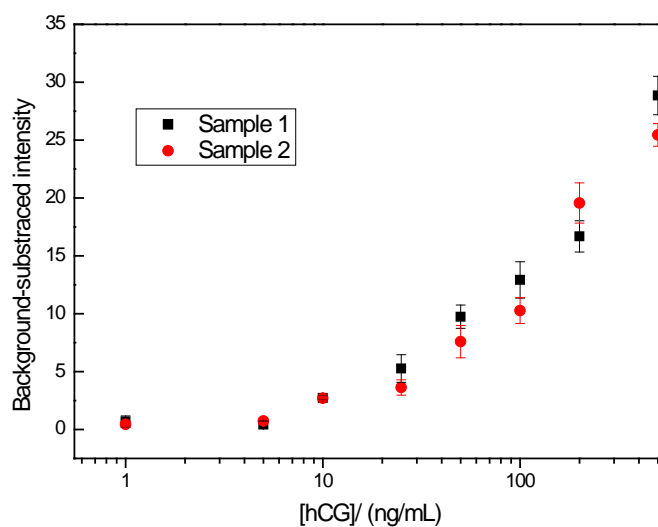

110

111 **Figure S3:** Calibration curve of hCG in urine samples (sample 1 was a urine sample from a man,

112 and sample 2 was a urine sample from a woman). hCG ranged from 1 to 500 ng/mL in substrate

113 buffer solution. The data are derived from 3 replicates.

114
